# Supplementary material for: Estimating the Health and Economic Benefits of Universal Salt Iodization Programs to Correct Iodine Deficiency Disorders
Source: PubMed Central journal article supplement (PMC7757618; doi:10.1089/thy.2019.0719), 2020-12-07
Supplement: Supp_Tables1-2.pdf [file Supp_Tables1-2.pdf]

## Supplementary Data

SUPPLEMENTARY TABLE S1. LOGIC MODEL TO DEVELOP BENEFITS

| <i>Clinical IDD 1993</i> |              |                | <i>Clinical IDD 2019</i> |               |               | <i>Benefits 1993–2019</i> |                           |                          |
|--------------------------|--------------|----------------|--------------------------|---------------|---------------|---------------------------|---------------------------|--------------------------|
| <i>a</i>                 | <i>b</i>     | <i>c</i>       | <i>d</i>                 | <i>e</i>      | <i>f</i>      | <i>g</i>                  | <i>h</i>                  | <i>i</i>                 |
| Population               | TGR %        | Baseline cases | Population               | Derived TGR % | Endline cases | Improved prevalence       | Cases do nothing scenario | Prevented or saved cases |
| UN population            | IGN database | $a \times b$   | UN population            | IGN database  | $d \times e$  | $(b - e)/b$               | $b \times d$              | $h - f$                  |

IDD, iodine deficiency disorders; IGN, Iodine Global Network; TGR, total goiter rate.

SUPPLEMENTARY TABLE S2. LOGIC MODEL AND PARAMETERS TO PROJECT BASELINE ECONOMIC LOSSES

|                               |   |                        |   |                                  |   |                              |   |                          |                  |   |                          |
|-------------------------------|---|------------------------|---|----------------------------------|---|------------------------------|---|--------------------------|------------------|---|--------------------------|
| <i>Coefficient of deficit</i> | × | <i>Number affected</i> | × | <i>Labor force participation</i> | × | <i>Median earning</i>        | × | <i>Average work-life</i> | <i>Apply NPV</i> | = | <i>Losses to economy</i> |
| % Earnings deficit:<br>6.12%  |   | TGR%<br>×<br># births  |   | %                                |   | \$/year:<br>GNI × wage share |   | 15–65 years:<br>50 years | NPV<br>@3%       |   | NPV<br>\$/year           |

NPV, net present value.
